# Supplementary material for: Association between Serum Zinc and Toll-like-Receptor- Related Innate Immunity and Infectious Diseases in Well-Nourished Children with a Low Prevalence of Zinc Deficiency: A Prospective Cohort Study
Source: MDPI journal article supplement (doi:10.3390/nu14245395), 2022-12-19
Supplement: s1 [file s1]

Supplement Table S1. Linear regression analysis to determine the association between serum zinc concentration and toll-like receptor stimulated cytokine responses at the age of 1 year

|                      | <u>Univariate analysis</u> |          | <u>Multivariate analysis</u> |          |
|----------------------|----------------------------|----------|------------------------------|----------|
|                      | (95% CI)                   | <i>p</i> | (95% CI)                     | <i>p</i> |
| <b><i>TLR1-2</i></b> |                            |          |                              |          |
| TNF- $\alpha$        | 0.002(-0.02, 0.02)         | 0.80     | 0.02(-0.01, 0.04)            | 0.14     |
| IL-6                 | -0.004(-0.02, 0.01)        | 0.51     | 0.01(-0.01, 0.02)            | 0.36     |
| IL-10                | -0.01(-0.02, 0.01)         | 0.29     | 0.01(-0.01, 0.03)            | 0.47     |
| <b><i>TLR3</i></b>   |                            |          |                              |          |
| TNF- $\alpha$        | 0.01(-0.03, 0.06)          | 0.60     | 0.04(-0.01, 0.09)            | 0.14     |
| IL-6                 | -0.01(-0.05, 0.02)         | 0.47     | 0.01(-0.02, 0.05)            | 0.44     |
| IL-10                | 0.005(-0.02, 0.03)         | 0.66     | 0.02(-0.02, 0.05)            | 0.36     |
| <b><i>TLR4</i></b>   |                            |          |                              |          |
| TNF- $\alpha$        | 5.68(-0.23, 34.49)         | 0.70     | 20.09(-18.50, 58.68)         | 0.30     |
| IL-6                 | -0.002(-0.01, 0.003)       | 0.42     | 0.003(-0.01, 0.01)           | 0.56     |
| IL-10                | -0.005(-0.02, 0.01)        | 0.44     | 0.003(-0.02, 0.02)           | 0.76     |
| <b><i>TLR7-8</i></b> |                            |          |                              |          |
| TNF- $\alpha$        | -0.01(-0.02, 0.01)         | 0.25     | 0.01(-0.01, 0.02)            | 0.26     |
| IL-6                 | -0.006(-0.01, 0.00)        | 0.07     | 0.001(-0.01, 0.01)           | 0.77     |
| IL-10                | -0.02(-0.04, 0.001)        | 0.07     | -0.02(-0.05, 0.01)           | 0.15     |
| <b><i>PHA</i></b>    |                            |          |                              |          |
| TNF- $\alpha$        | 0.002(-0.02, 0.02)         | 0.80     | 0.002(-0.04, 0.05)           | 0.94     |
| IL-6                 | 0.002(-0.02, 0.03)         | 0.88     | 0.002(-0.03, 0.03)           | 0.92     |
| IL-10                | 0.01(-0.01, 0.03)          | 0.38     | 0.01(-0.03, 0.04)            | 0.71     |

Adjusted for gestational age, gender, birth body weight, mode of delivery, maternal allergy, age of solid food introduction, and breastmilk duration

Supplement Table S2. The generalized estimating equation (GEE) for the change of zinc status during the 5-year follow up among patients with infectious diseases with adjustment of potential confounders

| Outcome /<br>Interaction effect | 1 y         |                | 2 y                |                | 3 y                |                | 5 y                |                |
|---------------------------------|-------------|----------------|--------------------|----------------|--------------------|----------------|--------------------|----------------|
|                                 | OR (95% CI) | <i>P</i> value | OR (95% CI)        | <i>P</i> value | OR (95% CI)        | <i>P</i> value | OR (95% CI)        | <i>P</i> value |
| Pneumonia                       | Reference   | -              | 0.91 (0.84-0.99)   | 0.03           | 0.92 (0.86-0.99)   | 0.03           | 0.91 (0.83-0.99)   | 0.04           |
| Croup                           | Reference   | -              | 0.97 (0.91- 1.03)  | 0.27           | 0.96 (0.91- 1.02)  | 0.16           | 0.99 (0.94 -1.05)  | 0.70           |
| AOM                             | Reference   | -              | 1.09 (0.94-1.26)   | 0.25           | 1.01 (0.90 – 1.14) | 0.89           | 1.02 (0.90-1.14)   | 0.81           |
| Enterocolitis                   | Reference   | -              | 0.84 (0.73-0.93)   | <0.001         | 0.95 (0.86 – 1.06) | 0.39           | 0.91 (0.81 – 1.02) | 0.09           |
| UTI                             | Reference   | -              | 0.98 (0.91 – 1.06) | 0.56           | 0.98 (0.90- 1.05)  | 0.50           | 0.97 (0.91- 1.03)  | 0.30           |

Adjusted for gestational age, gender, body weight at 1y, mode of delivery, and maternal education
